# Supplementary material for: Post-synthetic cation exchange in anionic metal–organic frameworks; a novel strategy for increasing the catalytic activity in solvent-free condensation reactions
Source: Royal Society of Chemistry journal article supplement (doi:10.1039/c4ra08142k), 2014-09-12
Supplement: c4ra08142k1.pdf [file c4ra08142k1.pdf]

**Electronic Supplementary Information**

**Post-Synthetic Cation Exchange in Anionic Metal-Organic Frameworks; Novel  
Strategy for Increasing Catalytic Activity in Solvent-Free Condensation Reactions**

**Saeideh Beheshti and Ali Morsali\***

Department of Chemistry, Faculty of Sciences, Tarbiat Modares University, P.O. Box  
14115-175, Tehran, Islamic Republic of Iran.

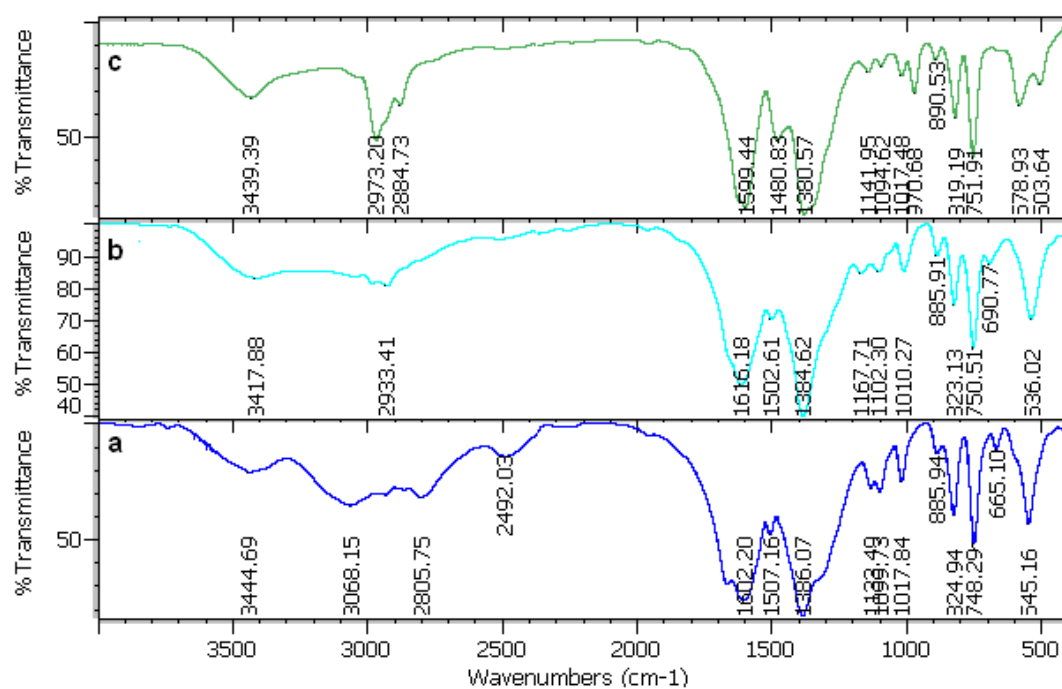

**Figure S1.** IR spectra of (a) colorless crystals of compound **1**, (b) post-synthetic MOF material of **5** and (c) post-synthetic MOF material of **6**.

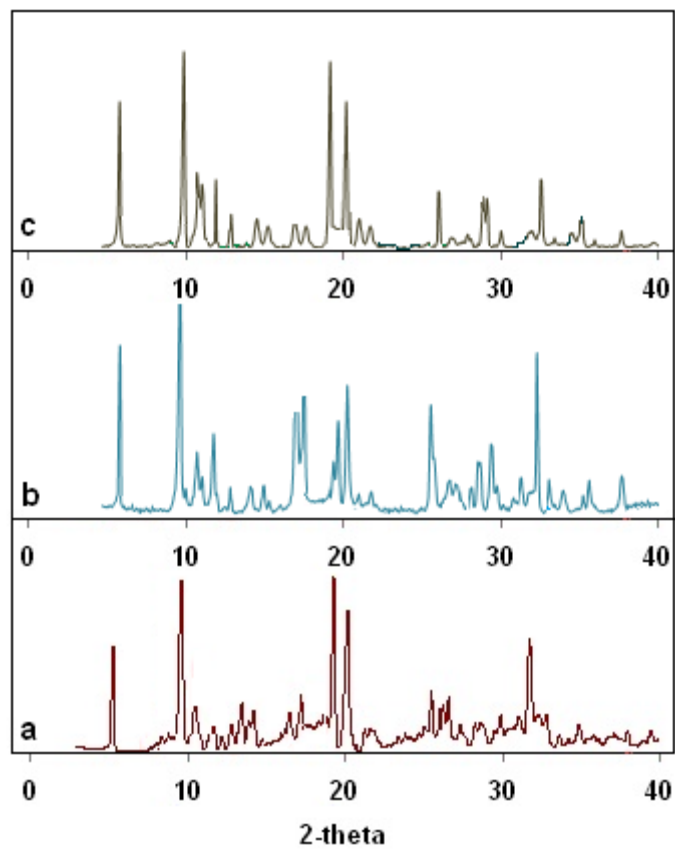

**Figure S2.** The XRD patterns of (a) compound **1**, (b) post-synthetic MOF material of **5** and (c) post-synthetic MOF material of **6**.

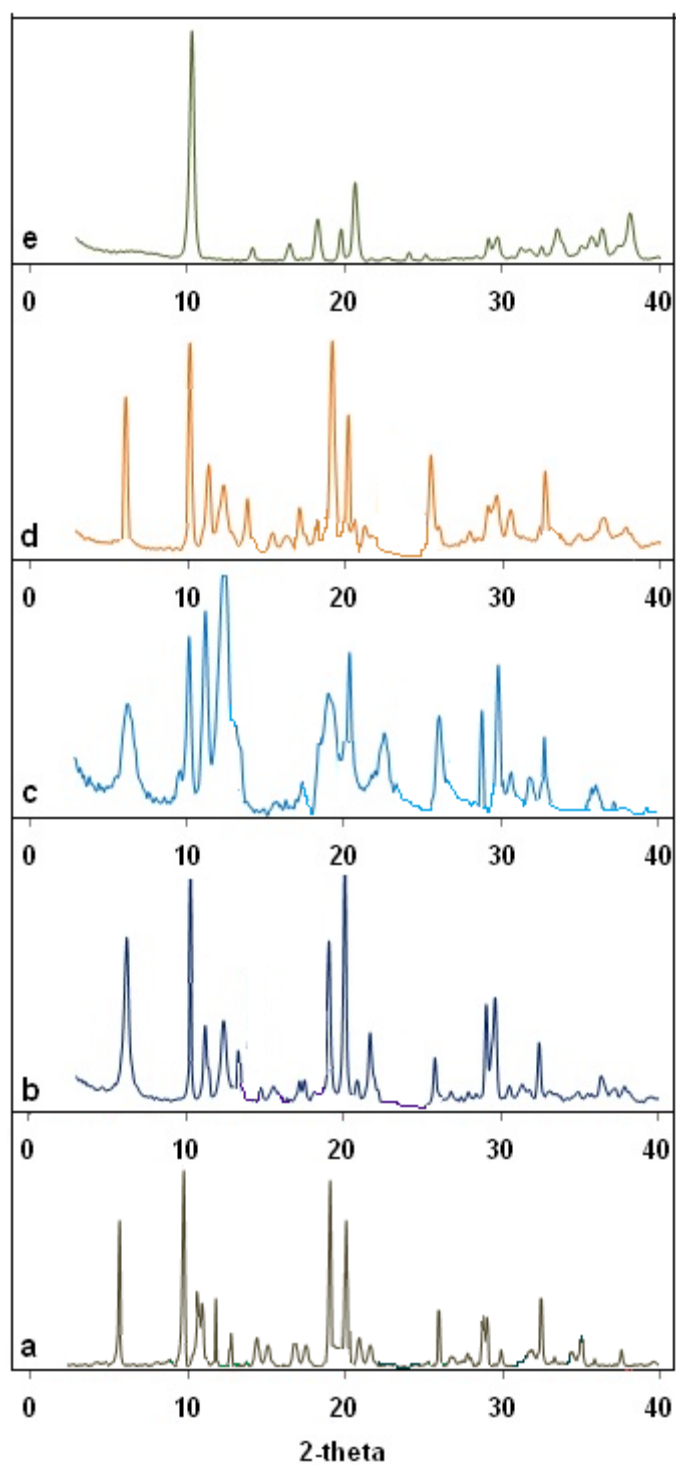

**Figure S3.** The XRD patterns of compound **6** samples which were immersed in (a) benzene, (b) toluene, (c) dichloromethane, (d) ethanol and (e) tetrahydrofuran (THF) after one week.

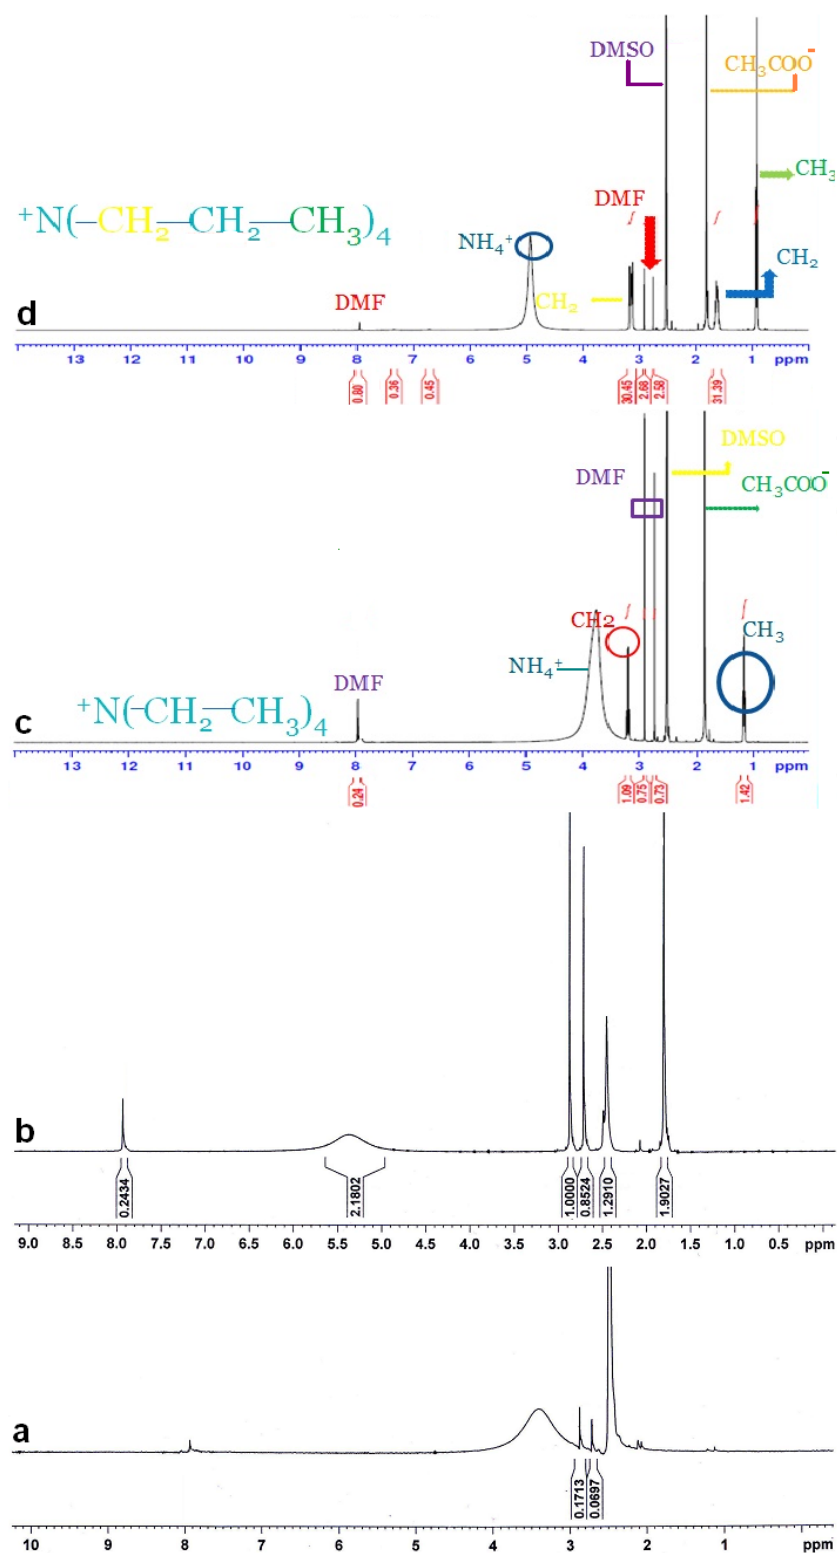

**Figure S4.** The  $^1\text{H}$ -NMR spectra of (a) compound **1**, (b) compound **1** after addition of 5 mg ammonium acetate to the tube, (c) compound **5** after addition of 5 mg ammonium acetate to the tube and (d) compound **6** after addition of 5 mg ammonium acetate to the tube.

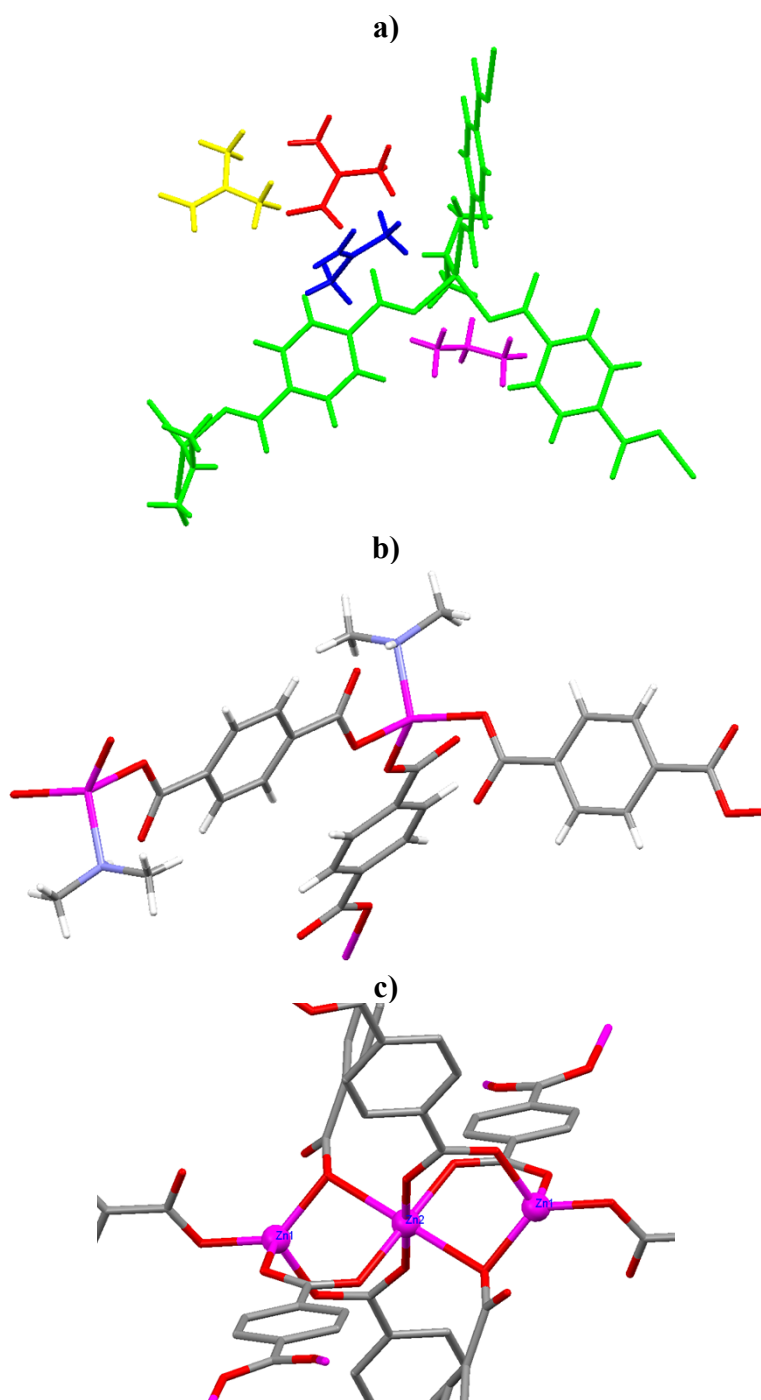

**Figure S5.** Showing the a) structure of the basic polymeric building block of compound **1** with three DMF molecules (red, blue and yellow species) and  $\text{HDMA}^+$  organic cation (violet species), b) coordination sphere around  $\text{Zn}^{\text{II}}$  ion in anionic MOF of **1** and c) trinuclear  $\text{Zn}_3$  cluster unit which exists in anionic MOF of **7** ( $\text{Zn}$  = violet,  $\text{O}$  = red,  $\text{N}$  = blue,  $\text{C}$  = gray and  $\text{H}$  = white).

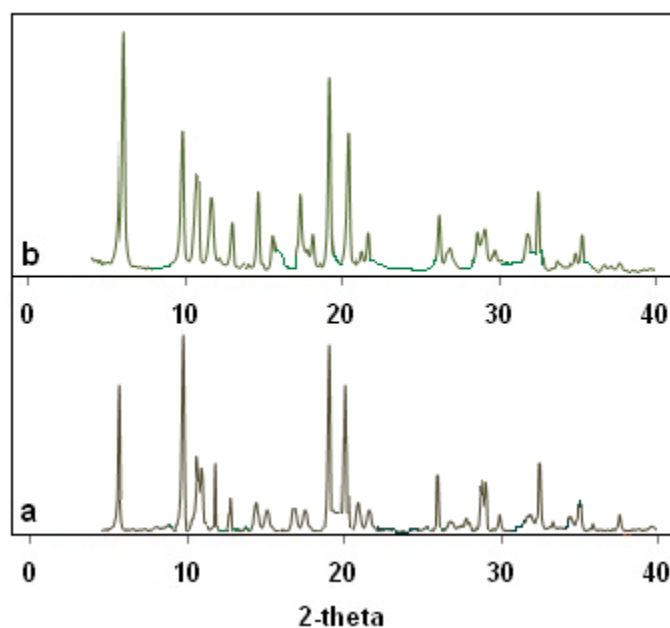

**Figure S6.** The XRD patterns of (a) compound **6** and (b) compound **6** after nine successive runs.

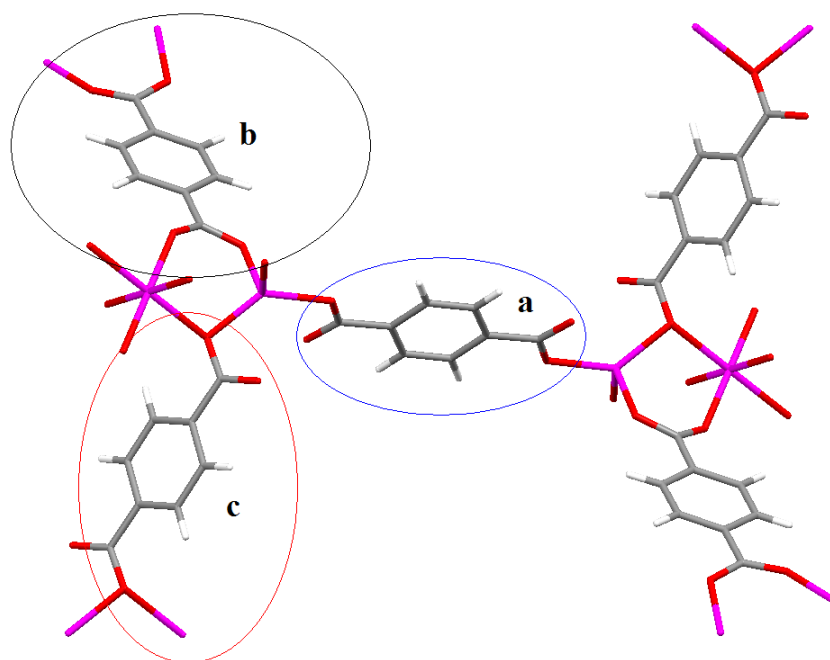

**Figure S7.** Showing three types of BDC<sup>2-</sup> anions with a)  $\mu_2$ , b)  $\mu_4$  and c)  $\mu_4$  coordination modes in anionic MOF of **7**, (Zn = violet, O = red, C = gray and H = white).

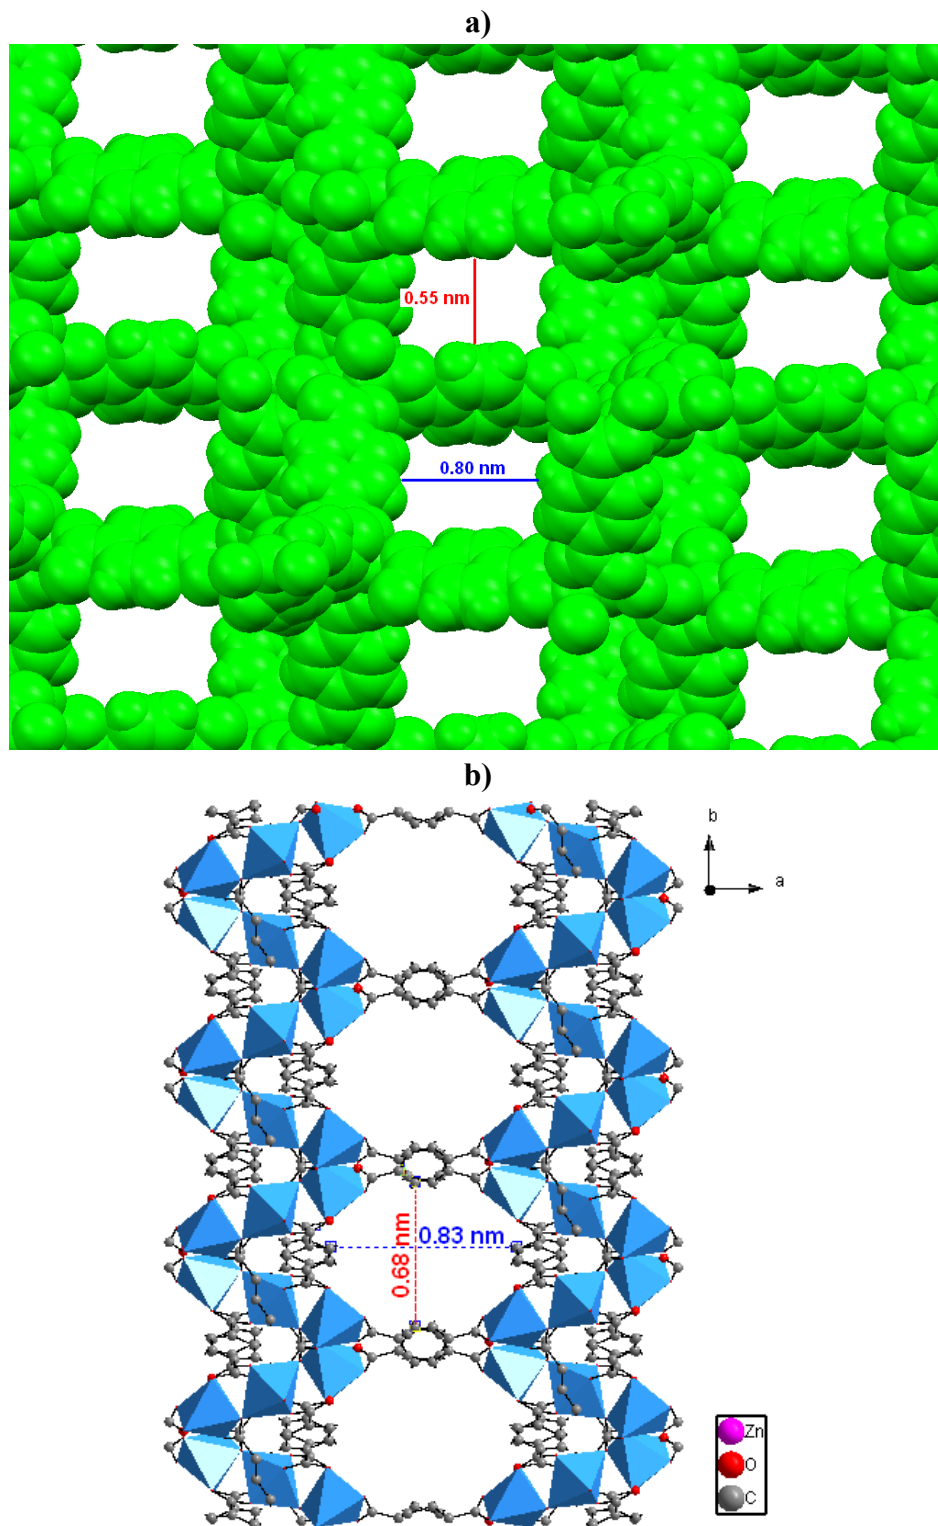

**Figure S8.** Showing the existence of one-dimensional channels along the crystallographic a) *b* axis and b) *c* axis in an anionic nano-porous MOF of 7.



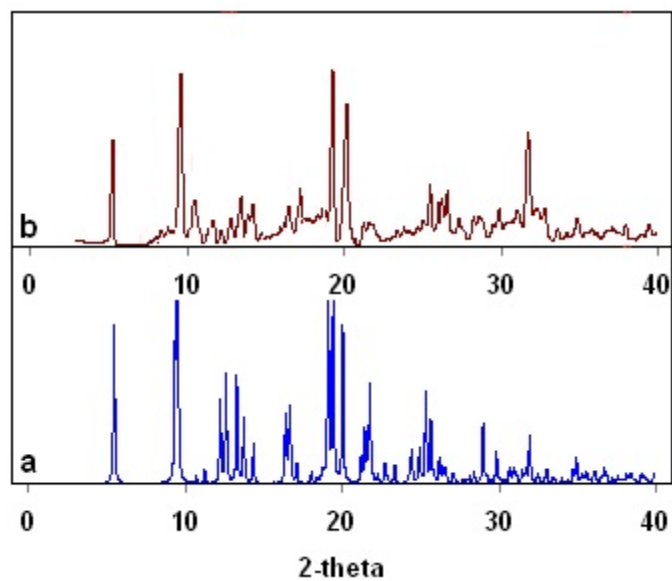

**Figure S9.** The XRD patterns of (a) simulated from single crystal X-ray data of compound **1** and (b) colorless crystals of compound **1**.

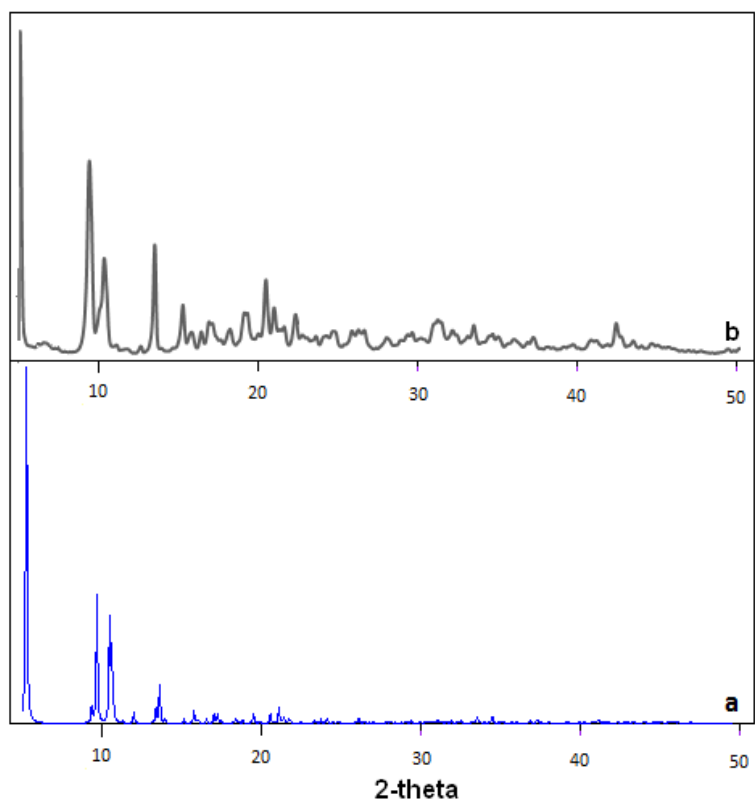

**Figure S10.** The XRD patterns of (a) simulated from single crystal X-ray data of compound **7** and (b) colorless crystals of compound **7**.
